# Supplementary material
Source: PubMed Central journal article supplement (PMC10524311)

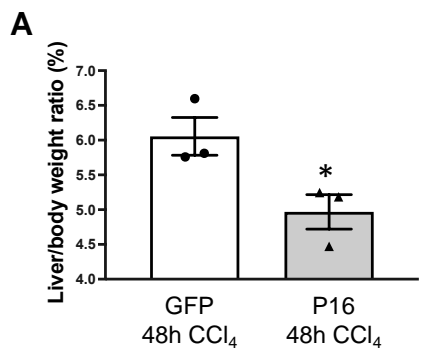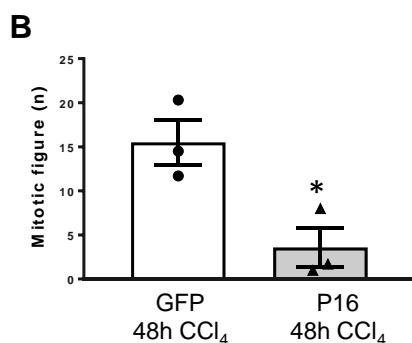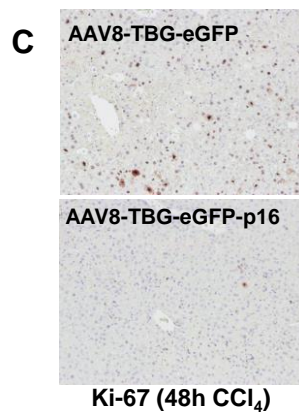

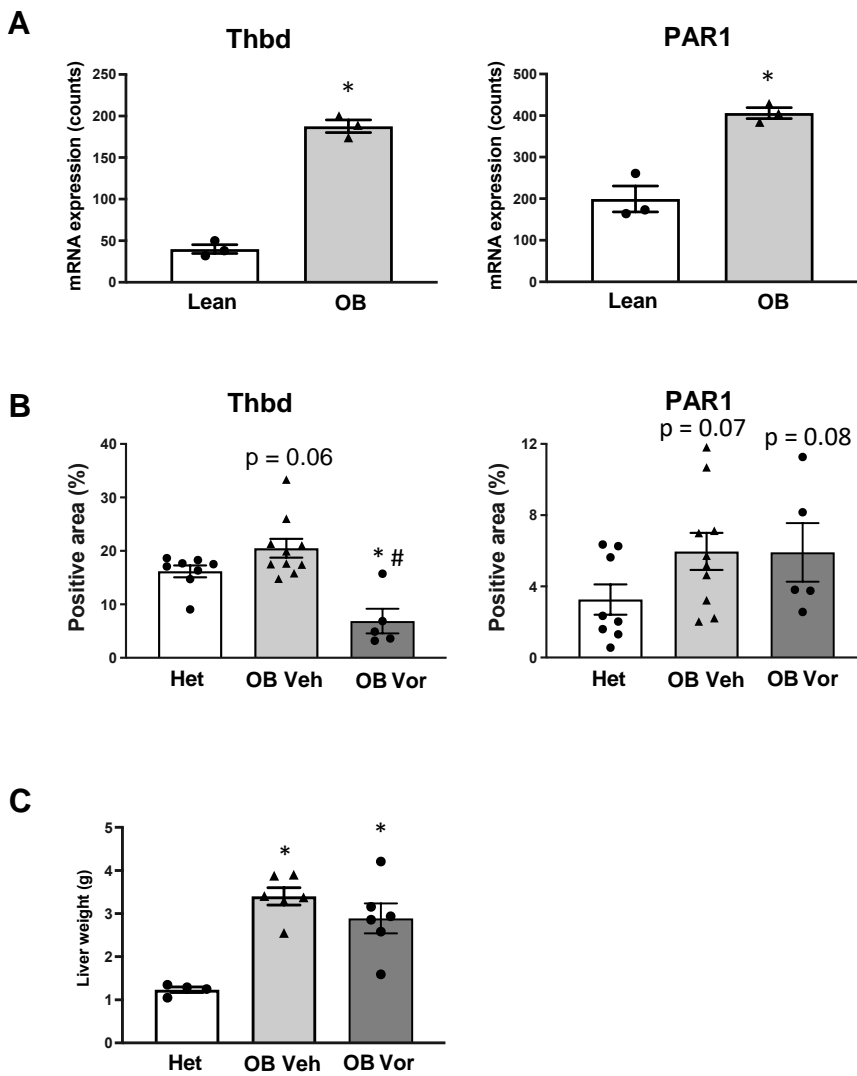

A

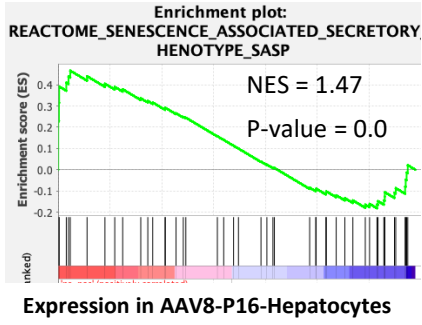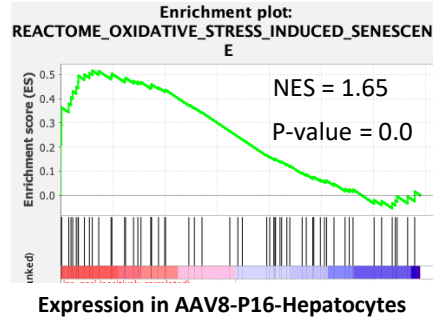

B

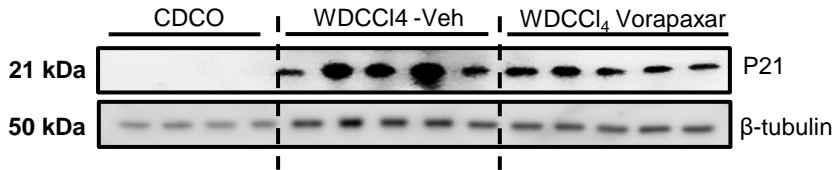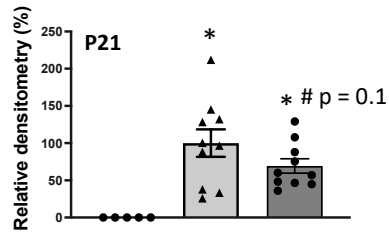

Supplement: NIHMS1890105-supplement-2.pdf [file NIHMS1890105-supplement-2.pdf]
